# Supplementary material for: Metabolic Hepatic Disorders Caused by Ciguatoxins in Goldfish (Carassius auratus)
Source: MDPI journal article supplement (doi:10.3390/ani12243500), 2022-12-11
Supplement: s1 [file s1]

## ***Supplementary Material***

### **Metabolic Hepatic Disorders Caused by Ciguatoxins in the Goldfish (*Carassius auratus*)**

**María José Ramos-Sosa<sup>1\*</sup>, Víctor Hernández López<sup>2,3</sup>, Andres Sanchez-Henao<sup>1</sup>, Natalia García-Álvarez<sup>1</sup>, Ana R. Díaz-Marrero<sup>2,4</sup>, Inmaculada Rosario<sup>1</sup>, Fernando Real<sup>1</sup> and José J. Fernández<sup>2,3</sup>**

<sup>1</sup> Division of Fish Health and Pathology, University Institute of Animal Health and Food Safety (IUSA), University of Las Palmas de Gran Canaria, 35416 Arucas, Gran Canaria, Spain

<sup>2</sup> Instituto Universitario de Bio-Organica Antonio González (IUBO AG), Universidad de La Laguna (ULL), Avenida Astrofísico Francisco Sánchez 2, 38206 La Laguna, Tenerife, Spain

<sup>3</sup> Departamento de Química Orgánica, Universidad de La Laguna (ULL), Avenida Astrofísico Francisco Sánchez s/n, 38206 La Laguna, Tenerife, Spain

<sup>4</sup> Instituto de Productos Naturales y Agrobiología (IPNA), Consejo Superior de Investigaciones Científicas (CSIC), Avenida Astrofísico Francisco Sánchez 3, 38206 La Laguna, Tenerife, Spain

**Table S1.** Goldfish data and experimental conditions of each individual analyzed in this study. Body weight and liver weight are expressed in grams (g).

| Fish number | Sample day | Diet       | Body weight (g) | Liver weight (g) | Hepatosomatic Index (HSI) |
|-------------|------------|------------|-----------------|------------------|---------------------------|
| 1           | 0          | Commercial | 46.20           | 0.9222           | 2.00                      |
| 2           | 0          | Commercial | 42.04           | 0.7562           | 1.80                      |
| 3           | 0          | Commercial | 47.15           | 1.1695           | 2.48                      |
| 4           | 1          | Toxic      | 53.66           | 1.5172           | 2.83                      |
| 5           | 1          | Toxic      | 46.92           | 0.9313           | 1.98                      |
| 6           | 1          | Non-toxic  | 39.18           | 0.9025           | 2.30                      |
| 7           | 1          | Non-toxic  | 40.15           | 0.9928           | 2.47                      |
| 8           | 8          | Toxic      | 46.00           | 1.8084           | 3.93                      |
| 9           | 8          | Toxic      | 43.70           | 1.2129           | 2.78                      |
| 10          | 8          | Non-toxic  | 42.52           | 1.1281           | 2.65                      |
| 11          | 8          | Non-toxic  | 32.17           | 0.6678           | 2.08                      |
| 12          | 15         | Toxic      | 59.38           | 1.6069           | 2.71                      |
| 13          | 15         | Toxic      | 55.50           | 1.1232           | 2.02                      |
| 14          | 15         | Non-toxic  | 49.34           | 1.0074           | 2.04                      |
| 15          | 15         | Non-toxic  | 36.23           | 1.0619           | 2.93                      |
| 16          | 29         | Toxic      | 42.75           | 1.3741           | 3.21                      |
| 17          | 29         | Toxic      | 63.30           | 2.1385           | 3.38                      |
| 18          | 29         | Non-toxic  | 45.84           | 1.8617           | 4.06                      |
| 19          | 29         | Non-toxic  | 47.12           | 0.9804           | 2.08                      |
| 20          | 36         | Toxic      | 81.21           | 2.5854           | 3.18                      |
| 21          | 36         | Toxic      | 41.22           | 1.0991           | 2.67                      |
| 22          | 36         | Non-toxic  | 35.85           | 0.5834           | 1.63                      |
| 23          | 43         | Toxic      | 38.31           | 1.2236           | 3.19                      |
| 24          | 43         | Non-toxic  | 51.65           | 1.9650           | 3.80                      |
| 25          | 102        | Detox      | 45.62           | 1.7824           | 3.91                      |
| 26          | 121        | Detox      | 66.93           | 3.1823           | 4.75                      |

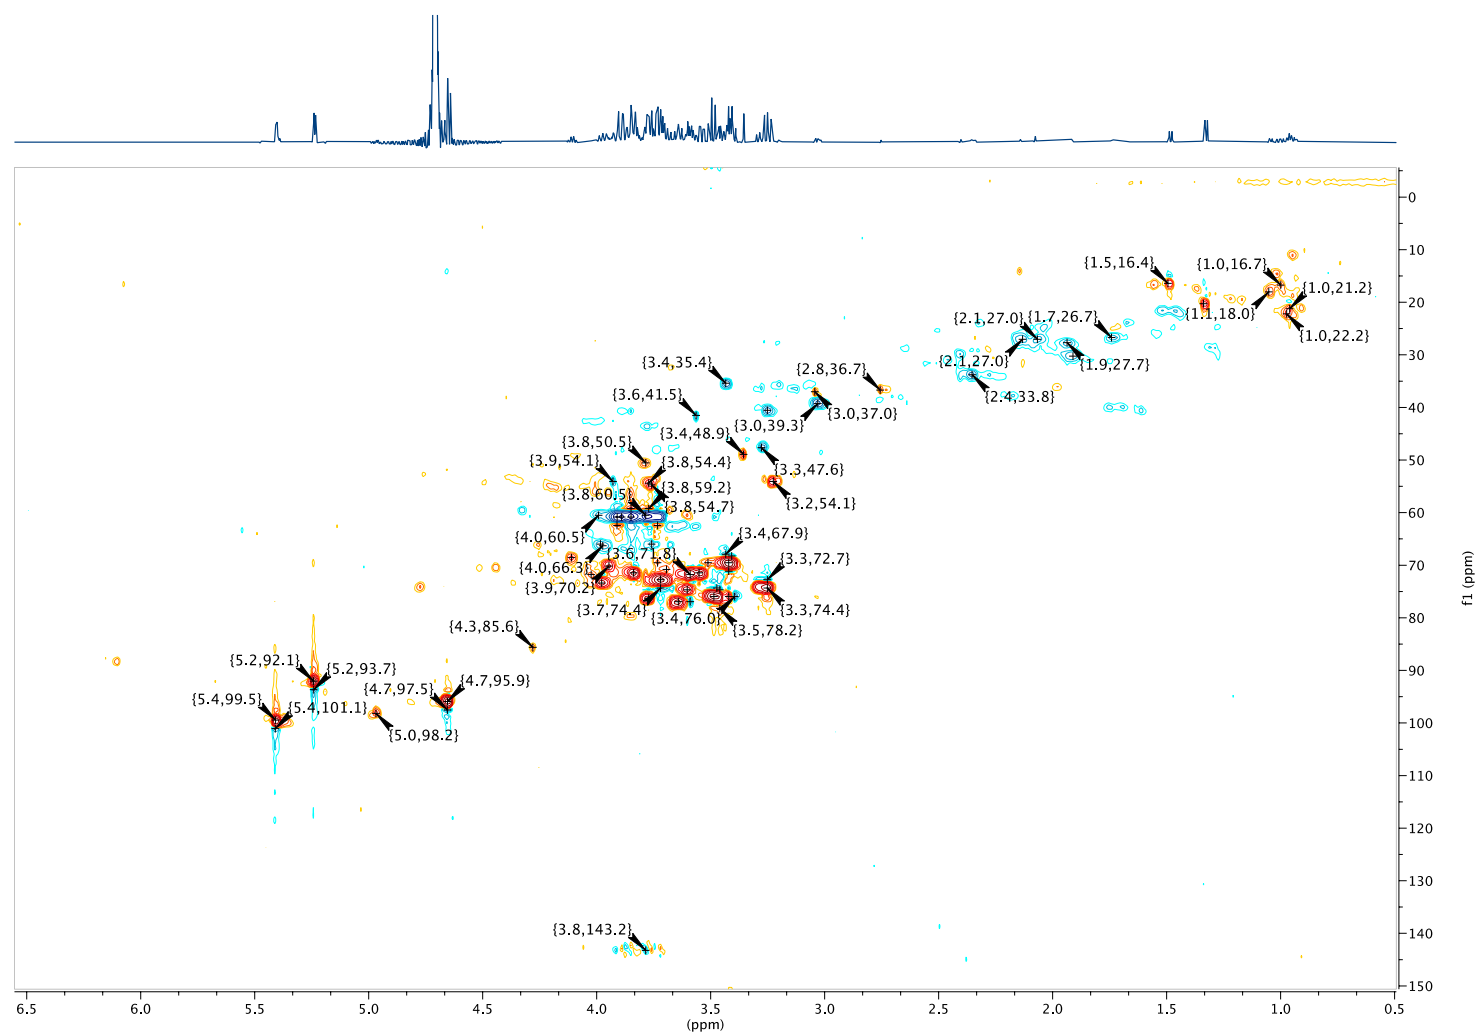

**Figure S1.** HSQC experiment of control sample recorded at 600 MHz (298 K).  $^1\text{H}$  and  $^{13}\text{C}$  cross peaks (ppm) of main signals are indicated.

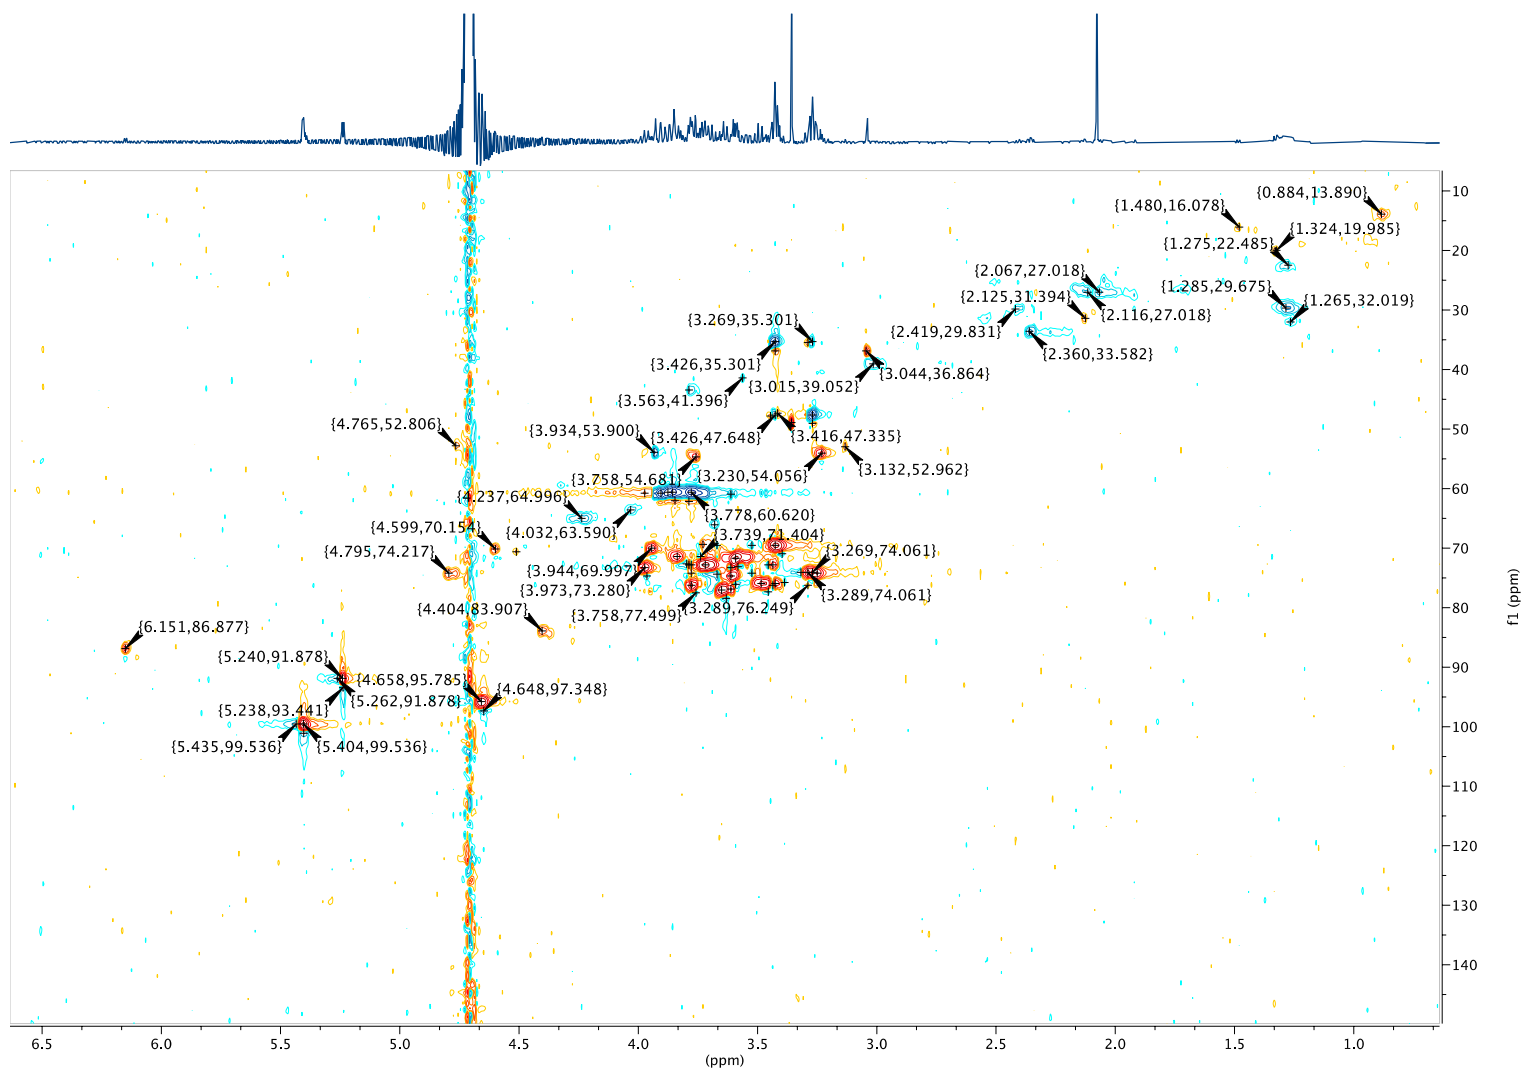

**Figure S2.** HSQC experiment of toxic sample after 36 days of treatment recorded at 600 MHz (298 K).  $^1\text{H}$  and  $^{13}\text{C}$  cross peaks (ppm) of main signals are indicated.

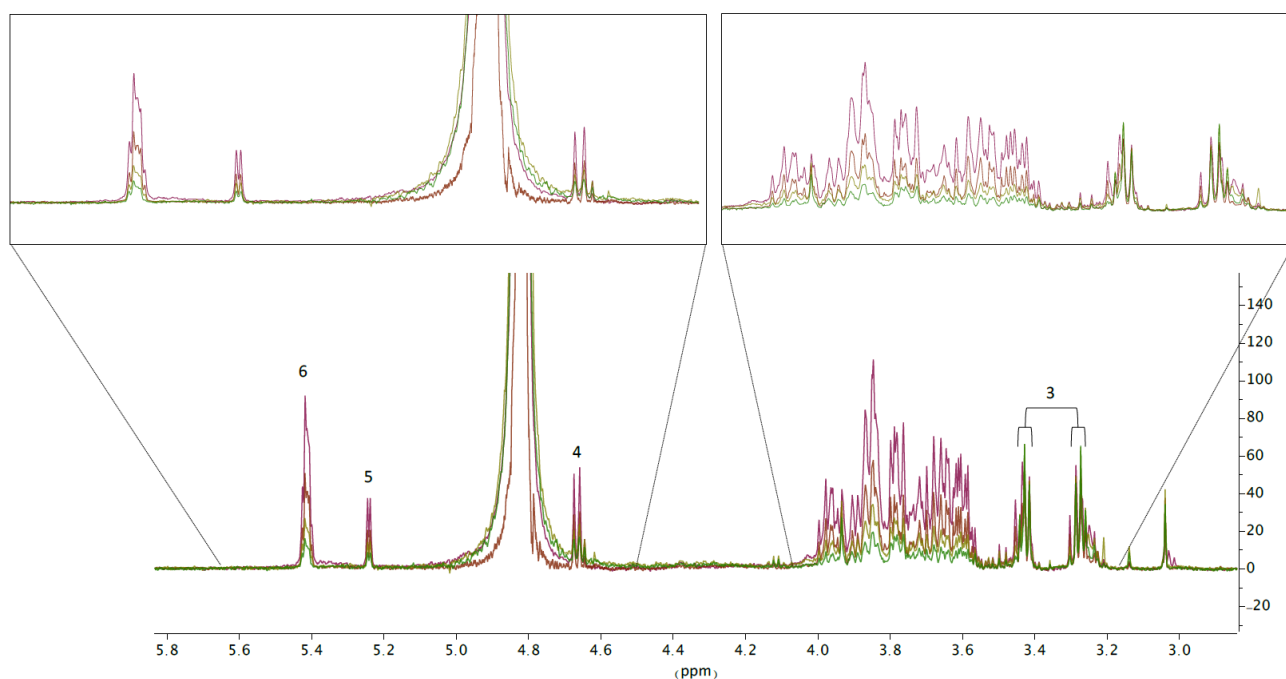

**Figure S3.** Effect of toxic diet on metabolic profile of liver tissues. Representative normalized  $^1\text{H}$  NMR spectra (500 MHz, 298 K) of the liver samples of *Carassius auratus* fed with CTX-toxic fish diet. Effect of time of treatment after 8 (green), 15 (ochre), 29 (orange) and 36 (purple) days. Key metabolites: (3) Taurine. (4)  $\alpha$ -Glucose. (5)  $\beta$ -Glucose. (6) Glycogen.

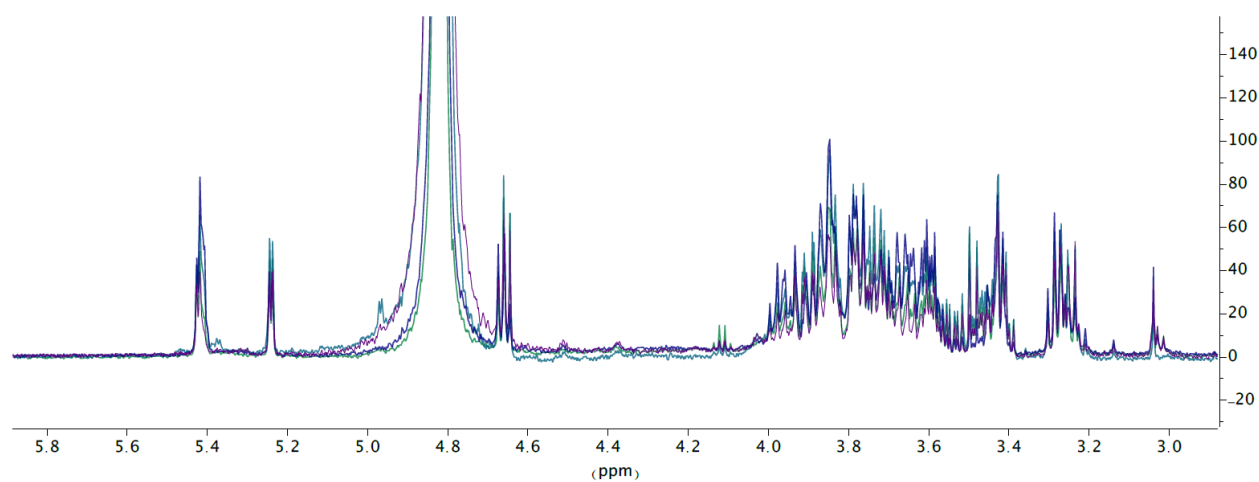

**Figure S4.** Effect of control diet on metabolic profile of liver tissues. Representative normalized  $^1\text{H}$  NMR spectra (500 MHz, 298 K) of the liver samples of *Carassius auratus* fed with non-toxic fish diet. Effect of time after 8 (purple), 15 (blue), 29 (cyan) and 36 (green) days.

**Table S2.** Ammonia (NH<sub>3</sub>) values (ppm) detected in the aquaria with a precision of  $\pm 0.05$  ppm at 25 °C. Measurements were done 24 h after the last ingestion, except for the days 0, 6 and 13. Fish were not fed on days 5 and 12 of the experiment. A change of water was performed on day 9.

| Sampling day | NH <sub>3</sub> value<br>Toxic<br>aquarium<br>(ppm) | NH <sub>3</sub> value<br>Non-toxic<br>aquarium (ppm) | Differences |
|--------------|-----------------------------------------------------|------------------------------------------------------|-------------|
| 0            | 0.000                                               | 0.219                                                | -0.219      |
| 1            | 0.364                                               | 0.874                                                | -0.510      |
| 2            | 0.886                                               | 1.323                                                | -0.437      |
| 3            | 1.566                                               | 1.396                                                | 0.170       |
| 4            | 2.197                                               | 1.044                                                | 1.153       |
| 6            | 3.035                                               | 0.219                                                | 2.816       |
| 7            | 3.545                                               | 0.473                                                | 3.072       |
| 8            | 4.176                                               | 0.959                                                | 3.217       |
| 9            | 4.832                                               | 1.433                                                | 3.399       |
| 9*           | 1.669                                               | 0.983                                                | 0.686       |
| 10           | 1.305                                               | 0.680                                                | 0.625       |
| 11           | 0.388                                               | 0.042                                                | 0.346       |
| 13           | 0.583                                               | 0.000                                                | 0.583       |
| 14           | 1.202                                               | 0.340                                                | 0.862       |
| 15           | 1.785                                               | 0.728                                                | 1.057       |

Blue line indicates a water renewal; \* the ammonia was measured just after the water change.

**Table S3.** Water parameters (ammonia (NH<sub>3</sub>) values (ppm), oxygen level (ppm), dissolved oxygen saturation (%), temperature (°C), nitrite (NO<sub>2</sub>), nitrate (NO<sub>3</sub>) (ppm), and pH) detected in the CTX-feed aquaria. Measurements were done 24 h after the last ingestion, except for the days 0, 6 and 13. Fish were not fed on days 5 and 12 of the experiment. A change of water was performed on day 9.

| Sampling day | NH <sub>3</sub> value (ppm) | O <sub>2</sub> level (ppm) | Dissolved O <sub>2</sub> saturation (%) | Temperature (° C) | NO <sub>2</sub> (ppm) | NO <sub>3</sub> (ppm) | pH   |
|--------------|-----------------------------|----------------------------|-----------------------------------------|-------------------|-----------------------|-----------------------|------|
| 0            | 0.000                       | 7.2                        | 85                                      | 23.5              | 0.05                  | 3                     | 6.38 |
| 1            | 0.364                       |                            |                                         |                   |                       |                       |      |
| 2            | 0.886                       |                            |                                         |                   |                       |                       |      |
| 3            | 1.566                       |                            |                                         |                   |                       |                       |      |
| 4            | 2.197                       | 7.2                        | 85                                      | 23.8              |                       |                       |      |
| 6            | 3.035                       |                            |                                         |                   |                       |                       |      |
| 7            | 3.545                       |                            |                                         |                   |                       |                       |      |
| 8            | 4.176                       | 7.1                        | 84                                      | 23.8              | 0.05                  | 2.5                   | 5.12 |
| 9            | 4.832                       |                            |                                         |                   |                       |                       |      |
| 9*           | 1.669                       | 7.3                        | 86                                      | 23.4              |                       |                       |      |
| 10           | 1.305                       |                            |                                         |                   |                       |                       |      |
| 11           | 0.388                       |                            |                                         |                   |                       |                       |      |
| 13           | 0.583                       |                            |                                         |                   |                       |                       |      |
| 14           | 1.202                       |                            |                                         |                   |                       |                       |      |
| 15           | 1.785                       |                            |                                         |                   |                       |                       |      |

Blue line indicates a water renewal; \* the ammonia was measured just after the water change.

**Table S4.** Water parameters (ammonia (NH<sub>3</sub>) values (ppm), oxygen level (ppm), dissolved oxygen saturation (%), temperature (°C), nitrite (NO<sub>2</sub>), nitrate (NO<sub>3</sub>) (ppm), and pH) detected in the non-toxic-feed aquaria. Measurements were done 24 h after the last ingestion, except for the days 0, 6 and 13. Fish were not fed on days 5 and 12 of the experiment. A change of water was performed on day 9.

| Sampling day | NH <sub>3</sub> value (ppm) | O <sub>2</sub> level (ppm) | Dissolved O <sub>2</sub> saturation (%) | Temperature (°C) | NO <sub>2</sub> (ppm) | NO <sub>3</sub> (ppm) | pH   |
|--------------|-----------------------------|----------------------------|-----------------------------------------|------------------|-----------------------|-----------------------|------|
| 0            | 0.219                       | 7.1                        | 84                                      | 23.8             | <0.05                 | 1                     | 5.41 |
| 1            | 0.874                       |                            |                                         |                  |                       |                       |      |
| 2            | 1.323                       |                            |                                         |                  |                       |                       |      |
| 3            | 1.396                       |                            |                                         |                  |                       |                       |      |
| 4            | 1.044                       |                            |                                         |                  |                       |                       |      |
| 6            | 0.219                       | 7.1                        | 85                                      | 24.0             | 0.00                  | 2.5                   | 5.16 |
| 7            | 0.473                       |                            |                                         |                  |                       |                       |      |
| 8            | 0.959                       |                            |                                         |                  |                       |                       |      |
| 9            | 1.433                       | 7.3                        | 86                                      | 23.7             |                       |                       |      |
| 9*           | 0.983                       |                            |                                         |                  |                       |                       |      |
| 10           | 0.680                       |                            |                                         |                  |                       |                       |      |
| 11           | 0.042                       |                            |                                         |                  |                       |                       |      |
| 13           | 0.000                       |                            |                                         |                  |                       |                       |      |
| 14           | 0.340                       |                            |                                         |                  |                       |                       |      |
| 15           | 0.728                       |                            |                                         |                  |                       |                       |      |

Blue line indicates a water renewal; \* the ammonia was measured just after the water change.
